# Supplementary material for: Spin-crossover phenomena of the mononuclear MnIII complex tuned by metal dithiolene counteranions
Source: Royal Society of Chemistry journal article supplement (doi:10.1039/c3dt53173b), 2013-12-19
Supplement: c3dt53173b.pdf [file c3dt53173b.pdf]

## Electronic Supplementary Information

### Spin-Crossover Phenomena of Mononuclear Mn<sup>III</sup> Complex Tuned by Metal Dithiolene Counteranions

Ying Chen,<sup>a</sup> Fan Cao,<sup>a</sup> Rong-Min Wei,<sup>a</sup> Yang Zhang,<sup>a</sup> Yi-Quan Zhang<sup>\*b</sup> and You Song<sup>\*a</sup>

**Table S1** Crystal structural data and refinement parameters for **2**.

| Complex                                        | <b>2</b>                                                                                                        |                    |                    |                    |                    |
|------------------------------------------------|-----------------------------------------------------------------------------------------------------------------|--------------------|--------------------|--------------------|--------------------|
| Chemical formula                               | C <sub>52</sub> H <sub>52</sub> Br <sub>4</sub> Mn <sub>2</sub> N <sub>12</sub> O <sub>4</sub> PtS <sub>4</sub> |                    |                    |                    |                    |
| Temperature/K                                  | 123(2)                                                                                                          | 296(2)             | 350(2)             | 400(2)             | 473(2)             |
| <i>F</i> <sub>w</sub> / g mol <sup>-1</sup>    | 1661.91                                                                                                         | 1661.91            | 1661.91            | 1661.91            | 1661.91            |
| Crystal system                                 | Triclinic                                                                                                       | Triclinic          | Triclinic          | Triclinic          | Triclinic          |
| Space group                                    | <i>P</i> $\bar{1}$                                                                                              | <i>P</i> $\bar{1}$ | <i>P</i> $\bar{1}$ | <i>P</i> $\bar{1}$ | <i>P</i> $\bar{1}$ |
| <i>a</i> /Å                                    | 8.1643(19)                                                                                                      | 8.2697(4)          | 8.2884(16)         | 8.3184(11)         | 8.356(2)           |
| <i>b</i> /Å                                    | 10.013(2)                                                                                                       | 10.0679(5)         | 10.0517(19)        | 10.0509(13)        | 10.057(3)          |
| <i>c</i> /Å                                    | 18.323(4)                                                                                                       | 18.4929(10)        | 18.518(4)          | 18.595(2)          | 18.676(5)          |
| <i>α</i> /°                                    | 78.223(3)                                                                                                       | 78.6030(10)        | 78.811(3)          | 78.835(2)          | 78.942(4)          |
| <i>β</i> /°                                    | 79.349(4)                                                                                                       | 79.1010(10)        | 79.000(3)          | 78.768(2)          | 78.639(4)          |
| <i>γ</i> /°                                    | 83.348(4)                                                                                                       | 84.2880(10)        | 84.998(3)          | 85.630(2)          | 86.212(4)          |
| Unit cell volume/Å <sup>3</sup>                | 1436.3(6)                                                                                                       | 1479.01(13)        | 1483.6(5)          | 1494.8(3)          | 1509.7(6)          |
| <i>Z</i>                                       | 1                                                                                                               | 1                  | 1                  | 1                  | 1                  |
| <i>ρ</i> <sub>calcd</sub> / mg m <sup>-3</sup> | 1.921                                                                                                           | 1.866              | 1.860              | 1.846              | 1.828              |
| <i>μ</i> /mm <sup>-1</sup>                     | 5.846                                                                                                           | 5.677              | 5.659              | 5.617              | 5.562              |
| Reflections measured                           | 11599                                                                                                           | 9037               | 12031              | 12122              | 11120              |
| Independent reflections                        | 5576                                                                                                            | 5784               | 5759               | 5813               | 5249               |
| <i>R</i> <sub>int</sub>                        | 0.0482                                                                                                          | 0.0242             | 0.0348             | 0.0369             | 0.0584             |
| <i>R</i> <sub>1</sub> (all data)               | 0.0572                                                                                                          | 0.0505             | 0.0502             | 0.0685             | 0.1042             |
| <i>wR</i> <sub>2</sub> (all data)              | 0.1463                                                                                                          | 0.0971             | 0.1369             | 0.1647             | 0.1393             |
| GOF on <i>F</i> <sup>2</sup>                   | 1.007                                                                                                           | 1.038              | 1.001              | 1.081              | 1.008              |

**Table S2** Octahedral structural parameters of Mn<sup>III</sup> for [Mn(5-Br-sal-N-1,5,8,12)]ClO<sub>4</sub> and complexes **1-3**.

|                                                           | [Mn(5-Br-sal-N-1,5,8,12)]ClO <sub>4</sub> |       |       |       | <b>1(up) and 2(down)</b> |       |       |       | <b>3</b> |       |
|-----------------------------------------------------------|-------------------------------------------|-------|-------|-------|--------------------------|-------|-------|-------|----------|-------|
|                                                           | 100 K                                     |       | 294 K |       | 123 K                    | 296 K | 350 K | 400K  | 473 K    | 296 K |
|                                                           | Mn1                                       | Mn2   | Mn1   | Mn2   | Mn1                      | Mn1   | Mn1   | Mn1   | Mn1      | Mn1   |
| average trigonal distortion angle $\Phi$ [°] <sup>a</sup> | 4.45                                      | 2.50  | 4.37  | 3.90  | 1.81                     | 2.28  | 2.52  | 2.88  | 3.06     | 5.69  |
| octahedral distortion parameter $\Sigma$ [°] <sup>b</sup> | 66.26                                     | 36.99 | 65.63 | 59.88 | 19.5                     | 24.26 | 29.54 | 34.53 | 37.64    | 83.66 |
|                                                           |                                           |       |       |       | 19.47                    | 25.87 | 30    | 37.14 | 40.34    |       |

<sup>a</sup> average trigonal distortion angle  $\Phi = \Sigma_1^{24}(|60 - \theta_i|)/24$  [ $\Phi = 0^\circ$  for an ideal octahedron;  $\theta_i$  represents the individual trigonal angles of the eight faces of the octahedron]<sup>1</sup>

<sup>b</sup> octahedral distortion parameter  $\Sigma = \Sigma_1^{12}(|90 - \varphi_i|)$  [ $\Sigma = 0^\circ$  for an ideal octahedron;  $\varphi_i$  represents the twelve smallest L–M–L angles]<sup>2</sup>

**Table S3** Selected bond lengths (Å) and angles (°) for **2**.

|                    | 123K       | 296K       | 350K       | 400K       | 473K       |
|--------------------|------------|------------|------------|------------|------------|
| Bond Distances (Å) |            |            |            |            |            |
| Mn(1)-O(1)         | 1.889(4)   | 1.883(3)   | 1.886(3)   | 1.874(3)   | 1.891(3)   |
| Mn(1)-O(2)         | 1.887(4)   | 1.876(3)   | 1.880(3)   | 1.882(3)   | 1.874(3)   |
| Mn(1)-N(1)         | 1.975(4)   | 2.015(4)   | 2.025(3)   | 2.071(4)   | 2.071(4)   |
| Mn(1)-N(2)         | 2.030(5)   | 2.069(4)   | 2.078(4)   | 2.111(4)   | 2.115(4)   |
| Mn(1)-N(3)         | 2.055(4)   | 2.088(4)   | 2.102(4)   | 2.135(5)   | 2.154(5)   |
| Mn(1)-N(4)         | 1.978(5)   | 2.011(4)   | 2.038(4)   | 2.054(4)   | 2.054(4)   |
| Pt(1)-S(1)         | 2.2865(14) | 2.2903(14) | 2.2831(13) | 2.2859(16) | 2.2892(15) |
| Pt(1)-S(2)         | 2.2922(14) | 2.2992(14) | 2.2968(12) | 2.2982(14) | 2.2922(15) |
| Bond Angles (°)    |            |            |            |            |            |
| O(2)-Mn(1)-O(1)    | 179.60(17) | 179.60(15) | 178.26(13) | 177.64(16) | 176.82(16) |
| O(2)-Mn(1)-N(4)    | 89.05(18)  | 88.58(15)  | 87.63(13)  | 87.64(15)  | 87.08(15)  |
| O(1)-Mn(1)-N(4)    | 90.58(18)  | 91.20(16)  | 90.88(14)  | 90.81(16)  | 91.01(15)  |
| O(2)-Mn(1)-N(1)    | 90.93(17)  | 90.91(15)  | 91.00(14)  | 91.16(15)  | 91.24(15)  |
| O(1)-Mn(1)-N(1)    | 88.98(17)  | 88.79(15)  | 88.35(13)  | 87.41(15)  | 86.73(15)  |
| N(4)-Mn(1)-N(1)    | 95.45(19)  | 97.75(16)  | 99.40(15)  | 101.76(17) | 103.31(17) |
| O(2)-Mn(1)-N(2)    | 88.56(18)  | 88.61(16)  | 89.28(14)  | 89.48(16)  | 90.11(16)  |
| O(1)-Mn(1)-N(2)    | 91.83(18)  | 91.64(16)  | 92.32(14)  | 92.32(17)  | 92.20(16)  |
| N(4)-Mn(1)-N(2)    | 173.93(18) | 172.58(18) | 171.02(15) | 170.46(17) | 169.71(17) |
| N(1)-Mn(1)-N(2)    | 90.17(19)  | 89.16(17)  | 89.07(15)  | 87.38(17)  | 86.64(17)  |
| O(2)-Mn(1)-N(3)    | 90.85(18)  | 91.52(16)  | 91.62(14)  | 92.88(16)  | 92.80(16)  |
| O(1)-Mn(1)-N(3)    | 89.28(18)  | 88.81(16)  | 89.22(14)  | 88.82(16)  | 89.63(16)  |
| N(4)-Mn(1)-N(3)    | 89.71(18)  | 88.92(17)  | 87.77(16)  | 87.13(18)  | 86.88(18)  |
| N(1)-Mn(1)-N(3)    | 174.6(2)   | 172.95(17) | 172.46(16) | 170.38(18) | 169.23(18) |
| N(2)-Mn(1)-N(3)    | 84.76(18)  | 84.28(17)  | 83.90(16)  | 83.93(18)  | 83.37(18)  |
| S(1)-Pt(1)-S(2)    | 90.05(5)   | 89.75(5)   | 89.71(4)   | 89.55(5)   | 89.50(5)   |
| S(1)-Pt(1)-S(2A)   | 89.95(5)   | 90.25(5)   | 90.29(5)   | 90.45(5)   | 90.50(5)   |

Symmetry code : 1 - x, 2 - y, 1 - z.

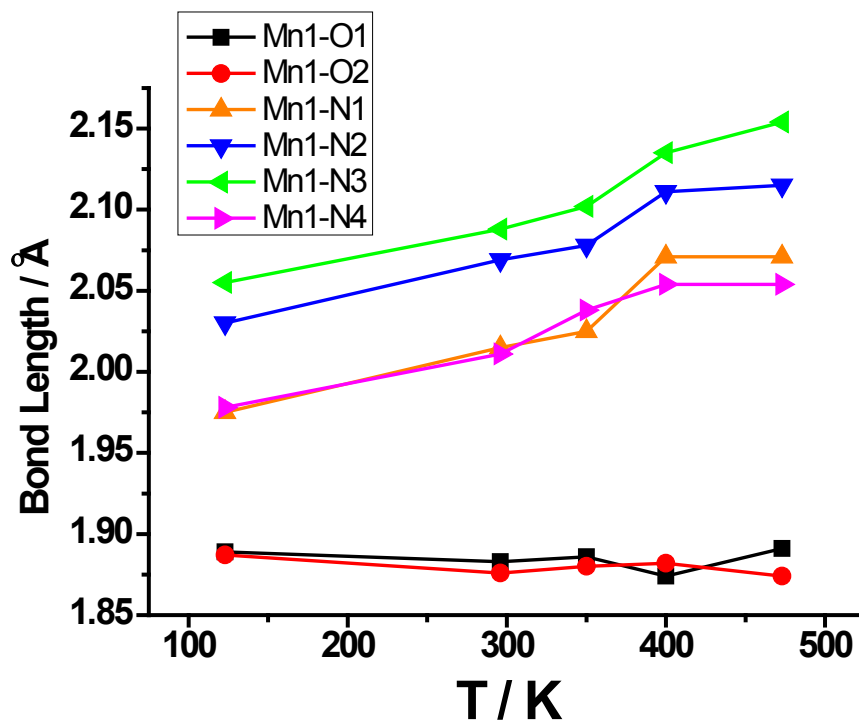

**Fig. S1** Comparison of Mn—N and Mn—O bond lengths at five collection temperatures in complex **2**.

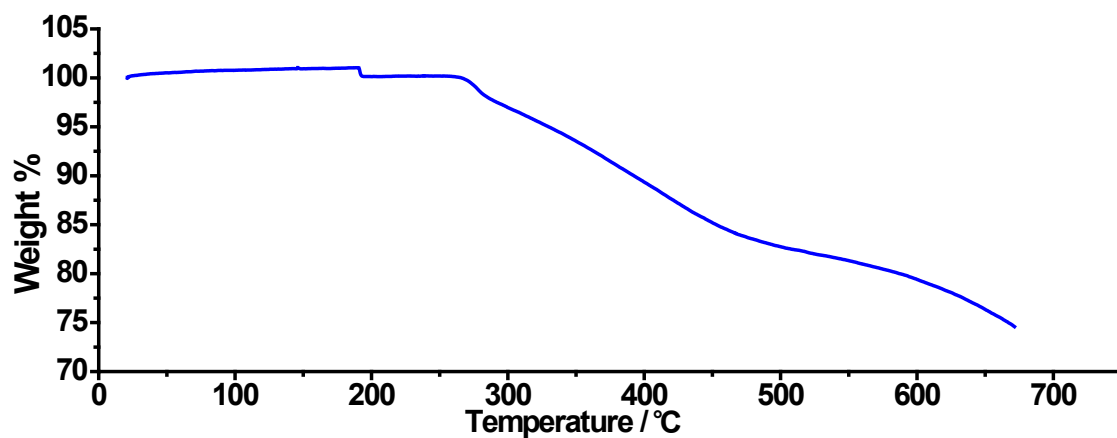

Fig. S2 TG plot of complex 1.

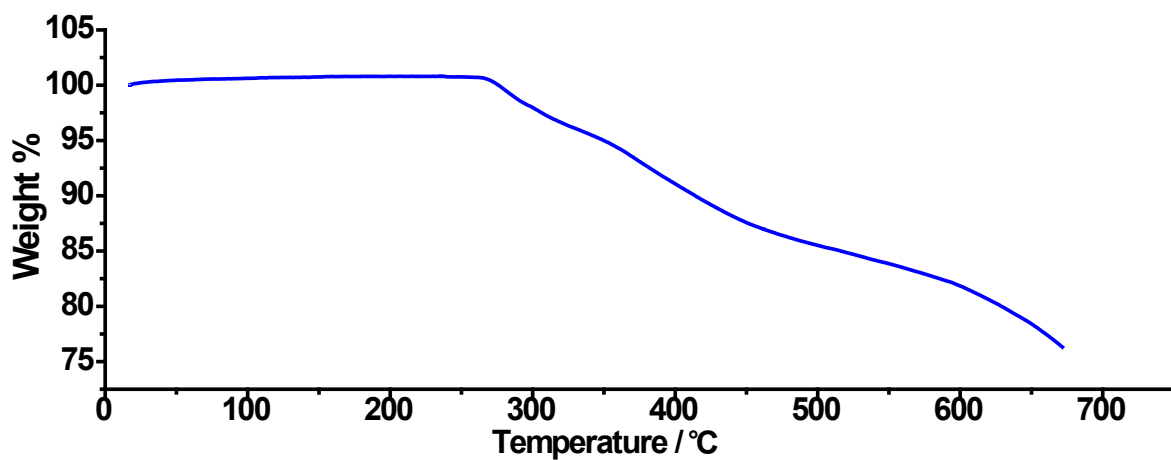

Fig. S3 TG plot of complex 2.

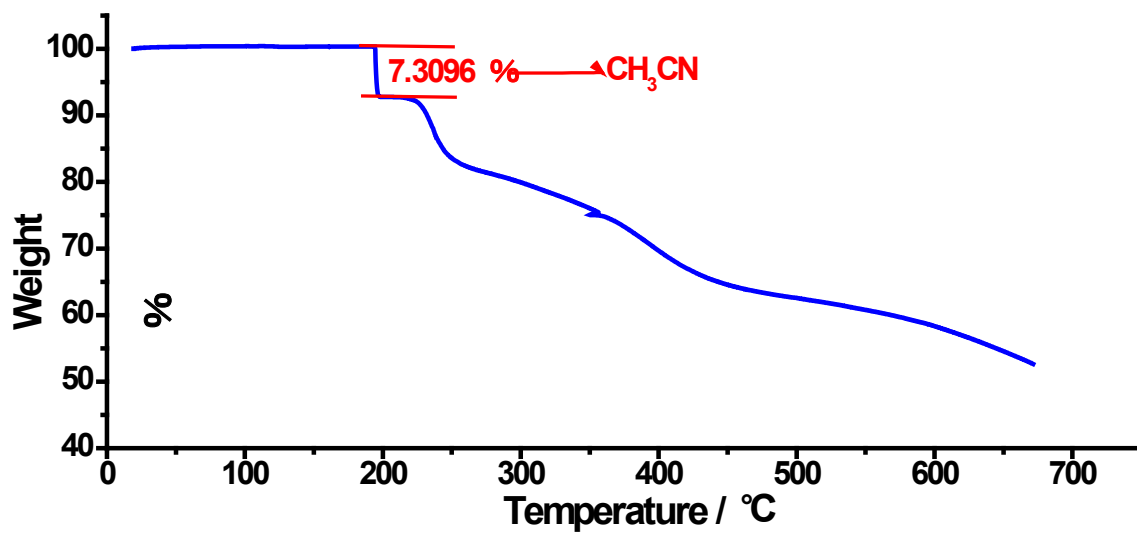

Fig. S4 TG plot of complex 3.

**Table S4** Calculated atomic spin population for the tetranuclear model in complex **3**.

|     |           |     |           |      |           |      |           |     |           |
|-----|-----------|-----|-----------|------|-----------|------|-----------|-----|-----------|
| Br1 | -0.000009 | C11 | -0.002410 | C21  | 0.004757  | O31  | -0.001408 | C41 | 0.002892  |
| Br2 | 0.000255  | C12 | 0.000009  | C22  | 0.001684  | Br32 | -0.000024 | C42 | -0.002434 |
| C3  | 0.010531  | C13 | 0.002727  | C23  | 0.000960  | Br33 | 0.000252  | C43 | 0.000005  |
| C4  | -0.002199 | C14 | 0.003601  | C24  | 0.005654  | C34  | 0.010805  | C44 | 0.002719  |
| C5  | 0.003807  | C15 | 0.000509  | Mn25 | 3.890469  | C35  | -0.002482 | C45 | 0.003621  |
| C6  | -0.000694 | C16 | 0.001801  | N26  | -0.025517 | C36  | 0.004082  | C46 | 0.000506  |
| C7  | 0.004286  | C17 | 0.000935  | N27  | 0.026463  | C37  | -0.001044 | C47 | 0.001816  |
| C8  | -0.002992 | C18 | 0.023297  | N28  | 0.016463  | C38  | 0.004600  | C48 | 0.000906  |
| C9  | 0.019913  | C19 | 0.000080  | N29  | -0.006923 | C39  | -0.003300 | C49 | 0.023315  |
| C10 | 0.002877  | C20 | -0.001650 | O30  | -0.005456 | C40  | 0.020179  | C50 | 0.000041  |

|      |           |      |           |     |           |      |           |     |           |
|------|-----------|------|-----------|-----|-----------|------|-----------|-----|-----------|
| C51  | -0.001650 | O61  | -0.005538 | S71 | -0.160345 | C81  | -0.031354 | S91 | -0.048771 |
| C52  | 0.004873  | O62  | -0.001675 | S72 | 0.003450  | C82  | -0.000099 | S92 | -0.152802 |
| C53  | 0.001511  | C63  | -0.041083 | S73 | 0.005636  | C83  | -0.033074 | S93 | -0.153376 |
| C54  | 0.001121  | C64  | -0.031299 | S74 | -0.048545 | C84  | -0.034130 | S94 | 0.004288  |
| C55  | 0.005539  | C65  | -0.000046 | S75 | -0.152831 | C85  | -0.000584 | S95 | 0.004719  |
| Mn56 | 3.891053  | C66  | -0.032905 | S76 | -0.153748 | Ni86 | -0.161884 | S96 | -0.043318 |
| N57  | -0.025817 | C67  | -0.034435 | S77 | 0.004325  | S87  | -0.150640 |     |           |
| N58  | 0.026460  | C68  | -0.000561 | S78 | 0.004675  | S88  | -0.160766 |     |           |
| N59  | 0.016363  | Ni69 | -0.162180 | S79 | -0.043342 | S89  | 0.003495  |     |           |
| N60  | -0.006885 | S70  | -0.150713 | C80 | -0.041317 | S90  | 0.005682  |     |           |

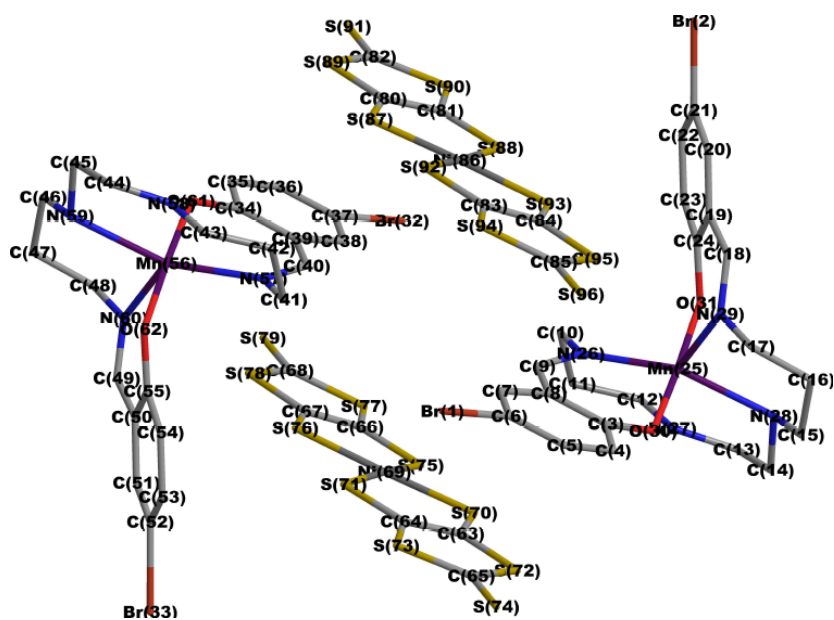

**Fig. S5** The corresponding model for calculated atomic spin population for complex **3**.

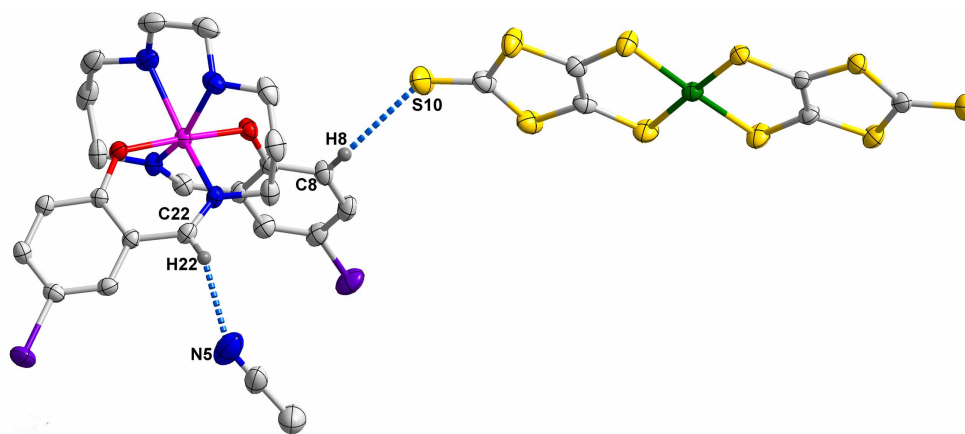

Fig. S6 Details of hydrogen bonds for complex 3 (A majority of hydrogen atoms are omitted for clarity).

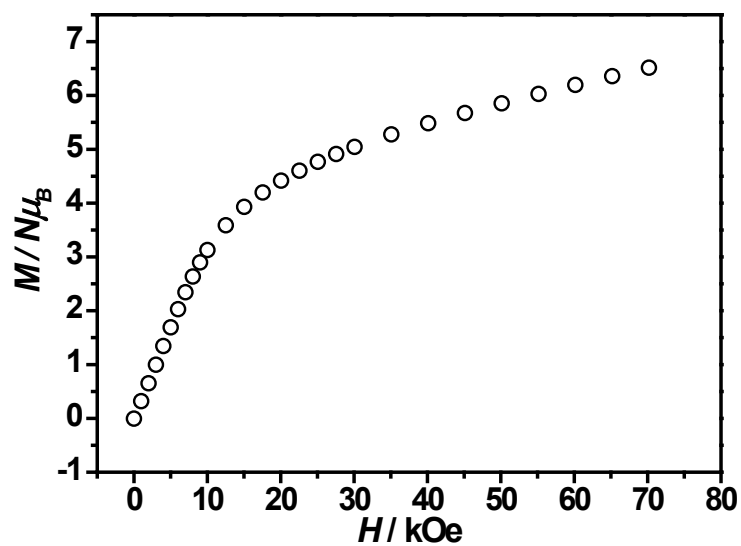

Fig. S7 Field dependence of magnetization at 1.8 K for complex 3.

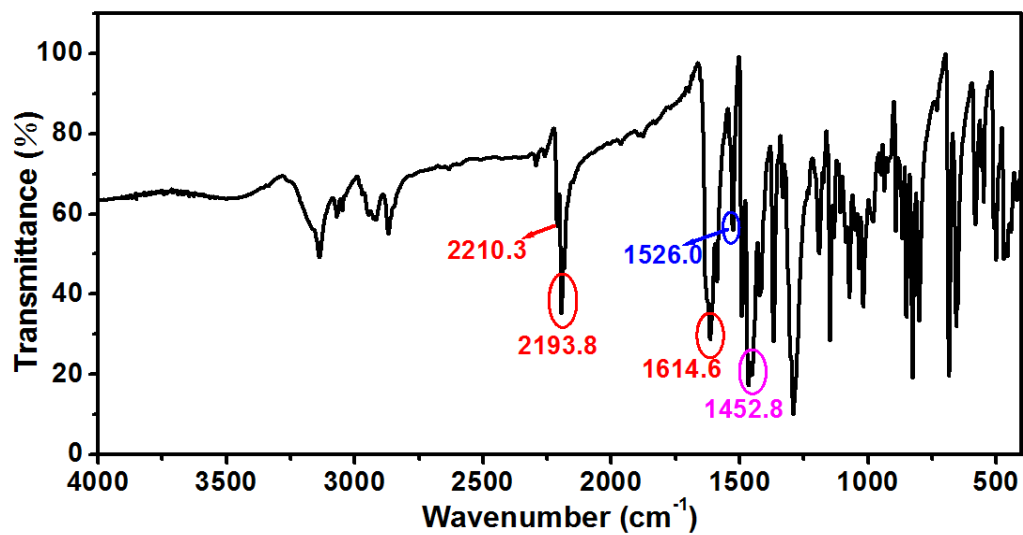

Fig. S8 IR spectrum of complex 1.

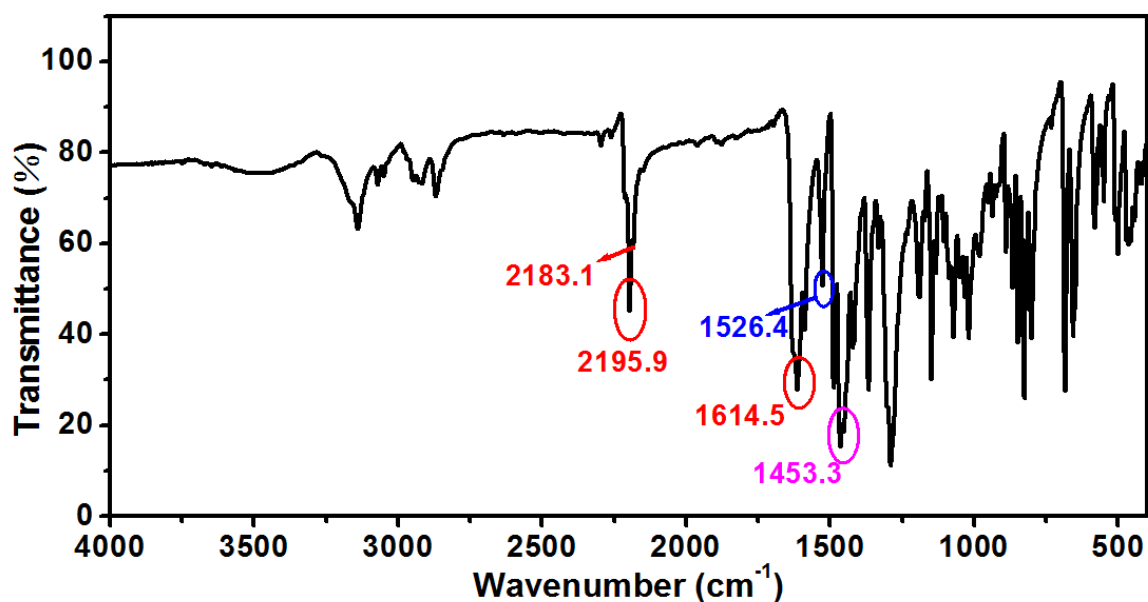

Fig. S9 IR spectrum of complex 2.

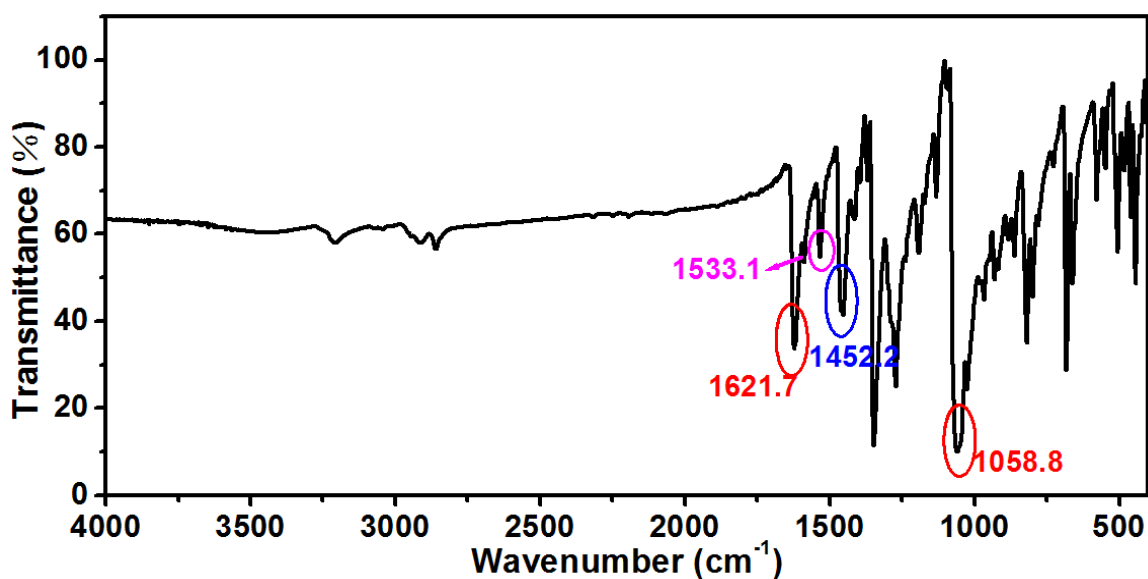

Fig. S10 IR spectrum of complex 3.

#### References

1. N. Ortega-Villar, A. L. Thompson, M. C. Muñoz, V. M. Ugalde-Saldívar, A. E. Goeta, R. Moreno-Esparza and J. A. Real, *Chem. Eur. J.*, 2005, **11**, 5721-5734.
2. J. Klingele, D. Kaase, M. H. Klingele, J. Lach and S. Demeshko, *Dalton Transactions*, 2010, **39**, 1689.
